# Supplementary material for: Neonatal Disruption of Serine Racemase Causes Schizophrenia-Like Behavioral Abnormalities in Adulthood: Clinical Rescue by D-Serine
Source: PLoS One. 2013 Apr 22;8(4):e62438. doi: 10.1371/journal.pone.0062438 (PMC3632541; doi:10.1371/journal.pone.0062438)
Supplement: Table S1 — Effect of neonatal Met-Phen treatment on levels of amino acids in the brain at juvenile. (XLSX) [file pone.0062438.s001.xlsx]

## Sheet: Sheet1
Table S1. Effect of neonatal Met-Phen treatment on levels of amino acids in the brain at juvenile.
	Glutamate	Glutamine	Glycine	L-Serine	D-Serine
Frontal cortex
Control	6.583 ± 0.492	1.696 ± 0.126	0.372 ± 0.032	0.311± 0.027	0.462 ± 0.090
Met-Phen	6.567 ± 0.511 (99.8%)	1.904 ± 0.140 (112%)	0.383 ± 0.029 (103%)	0.338 ± 0.025 (109%)	0.488 ± 0.038 (106%)
Hippocampus
Control	7.860 ± 0.774	2.620 ± 0.308	0.662 ± 0.057	0.527 ± 0.062	0.197 ± 0.024
Met-Phen	6.839 ± 0.366 (87.0%)	2.430 ± 0.156 (92.7%)	0.600 ± 0.046 (90.6%)	0.505 ± 0.045 (95.8%)	0.199 ± 0.020 (101%)
Cerebellum
Control	4.792 ± 0.165	1.669 ± 0.098	0.875 ± 0.050	0.311 ± 0.010	0.053± 0.006
Met-Phen	4.860 ± 0.238 (101%)	2.066 ± 0.196 (124%)	0.993 ± 0.046 (113%)	0.363 ± 0.013 (117%)*	0.065 ± 0.003 (123%)
Data (nmol/mg tissue) are expressed as the mean ± SEM (Control: n= 7, Met-Phen: n=6)
Parenthesis is the percentage of control values.
*p < 0.05 compared to control group (Student’s t test).
